# Supplementary material for: Galactomannan Pentasaccharide Produced from Copra Meal Enhances Tight Junction Integration of Epithelial Tissue through Activation of AMPK
Source: MDPI journal article supplement (doi:10.3390/biomedicines7040081), 2019-10-14
Supplement: s1 [file s1]

Supplementary data

# Galactomannan pentasaccharide produced from copra meal enhances tight junction integration of epithelial tissue through activation of AMPK

Chatchai Nopvichai <sup>1</sup>, Pawin Pongkorpsakol <sup>2</sup>, Preedajit Wongkrasant <sup>2</sup>, Karan Wangpaiboon <sup>1</sup>,  
Thanapon Charoenwongpaiboon<sup>1</sup>, Kazuo Ito <sup>3</sup>, Chatchai Muanprasat <sup>2</sup>, Rath Pichyangkura<sup>1\*</sup>

<sup>1</sup> Department of Biochemistry, Faculty of Science, Chulalongkorn University, Thailand.

<sup>2</sup> Department of Physiology, Faculty of Science, Mahidol University, Thailand

<sup>3</sup> Graduate school of science, Osaka city university, Japan

\* Correspondence: prath@chula.ac.th

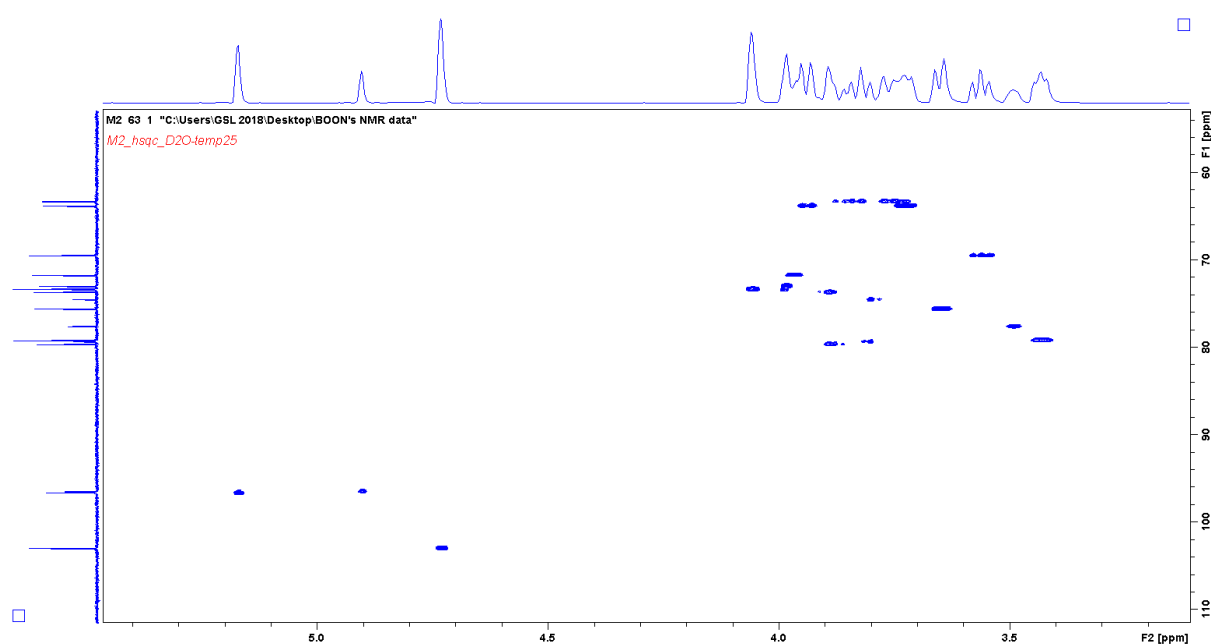

Fig.S1 HSQC spectrum of m-2.

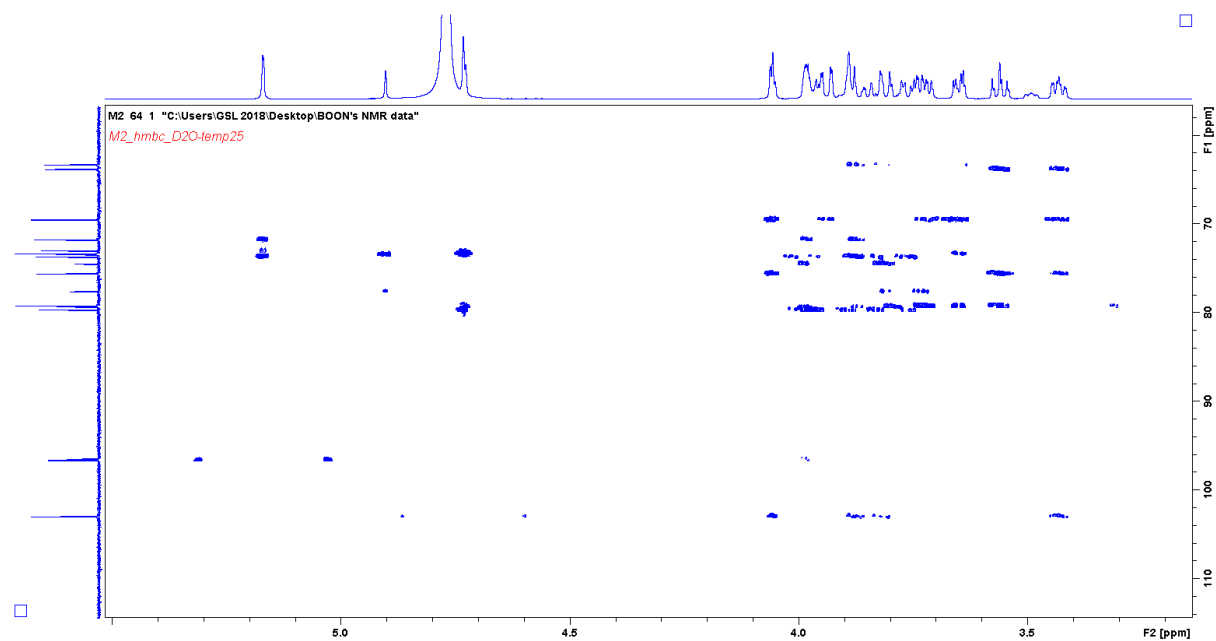

**Fig.S2** HMBC spectrum of m-2.

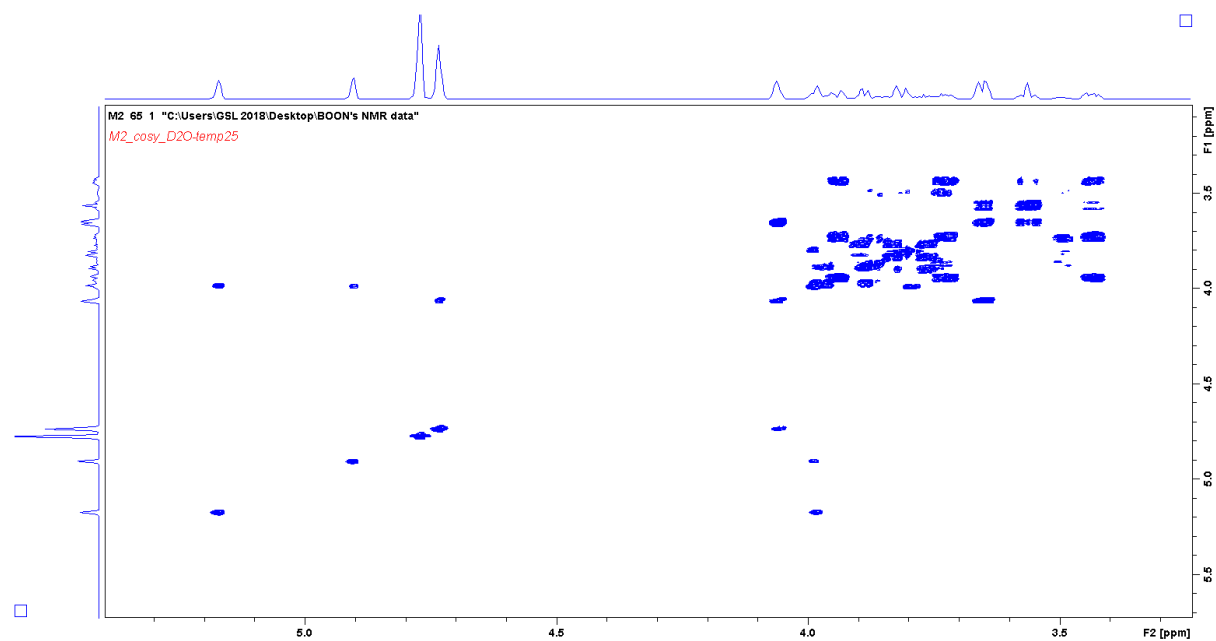

**Fig.S3** COSY spectrum of m-2.

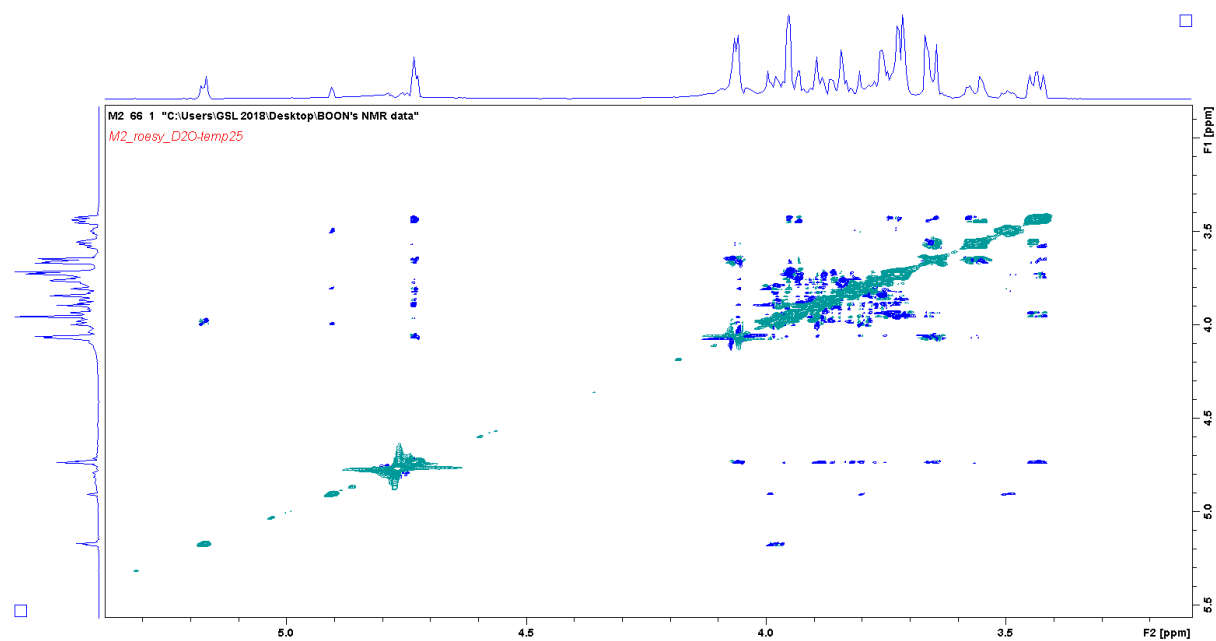

**Fig.S4** ROESY spectrum of m-2.

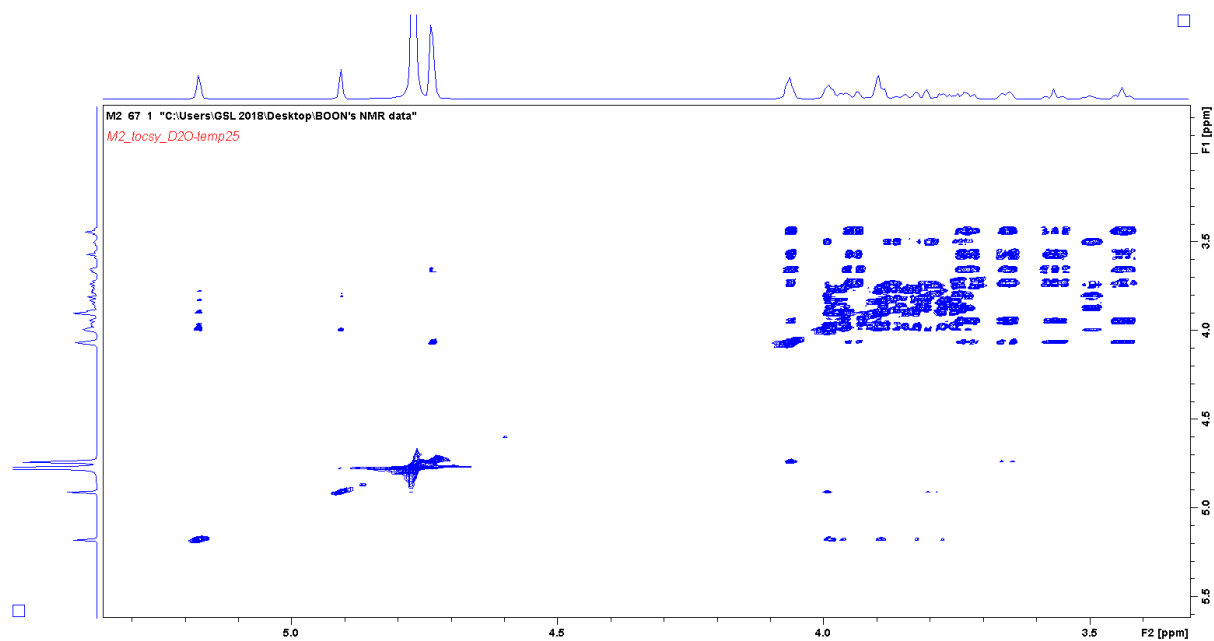

**Fig.S5** TOCSY spectrum of m-2.

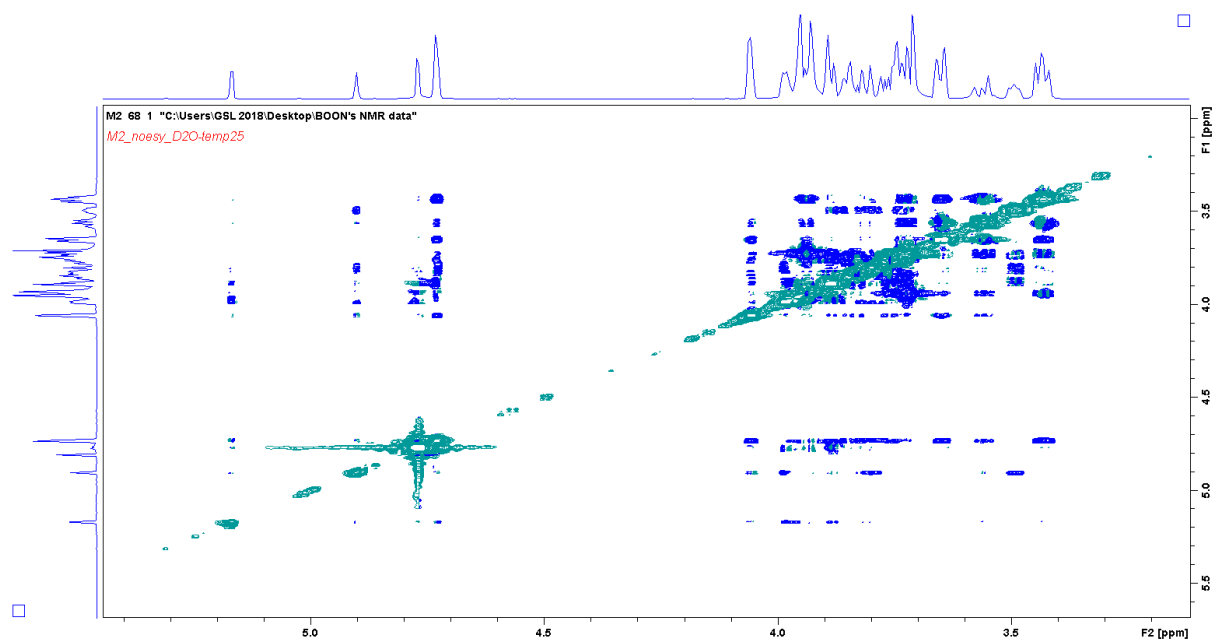

**Fig.S6** NOESY spectrum of m-2.

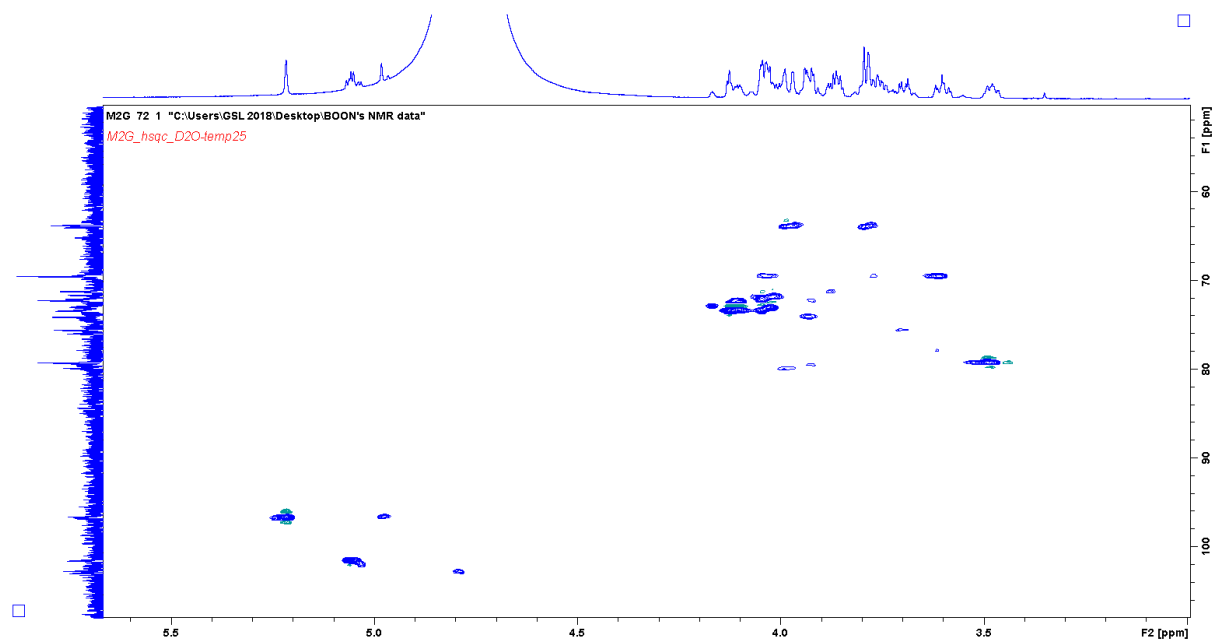

**Fig.S7** HSQC spectrum of m-3.

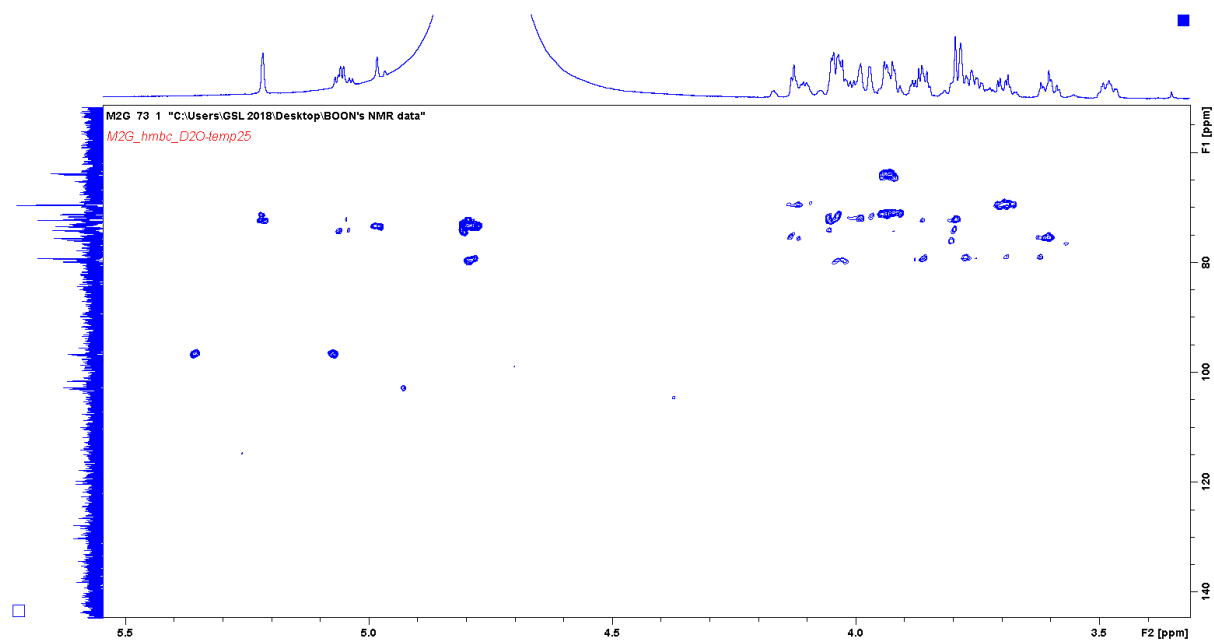

**Fig.S8** HMBC spectrum of m-3.



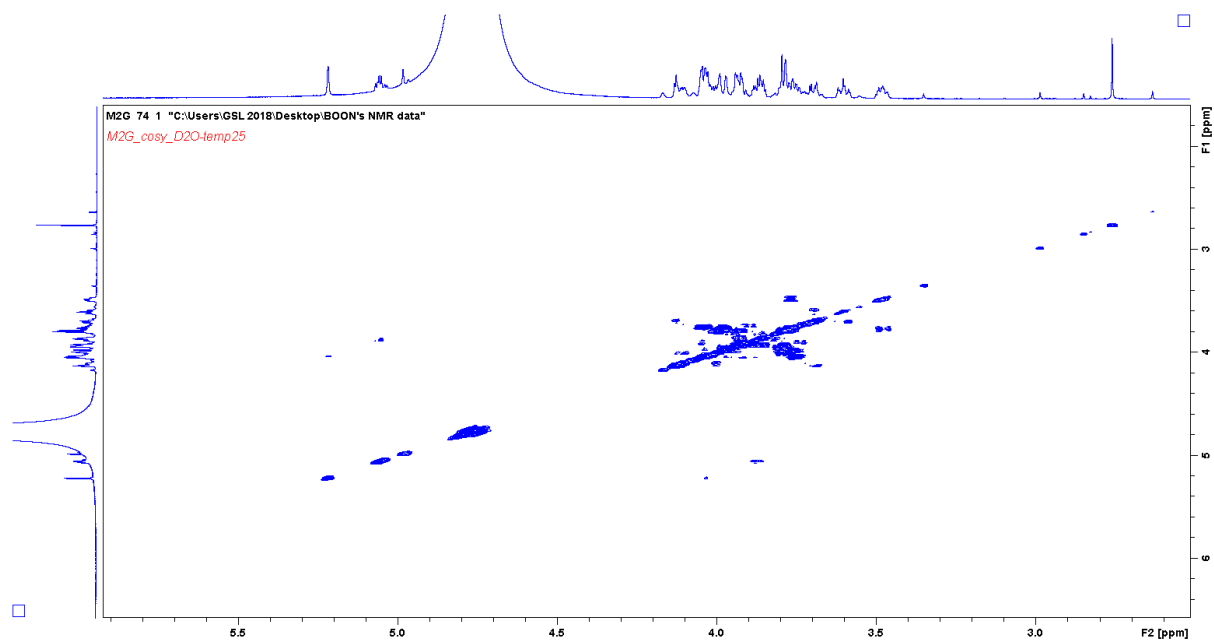

**Fig.S9** COSY spectrum of m-3.

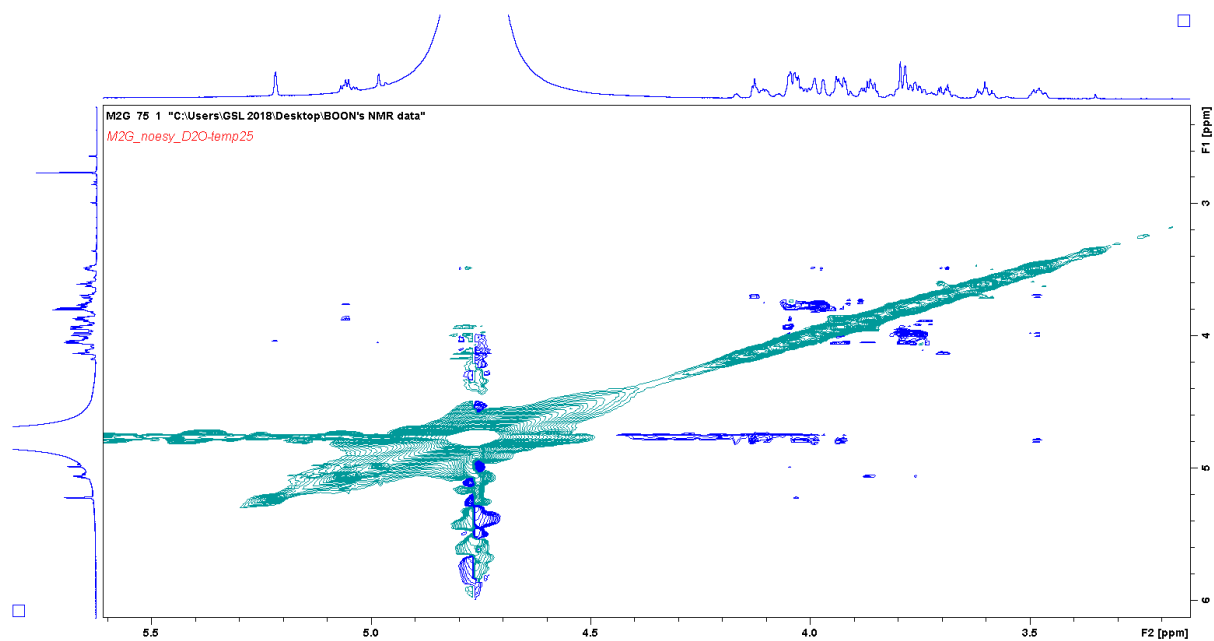

**Fig.S10** NOESY spectrum of m-3.

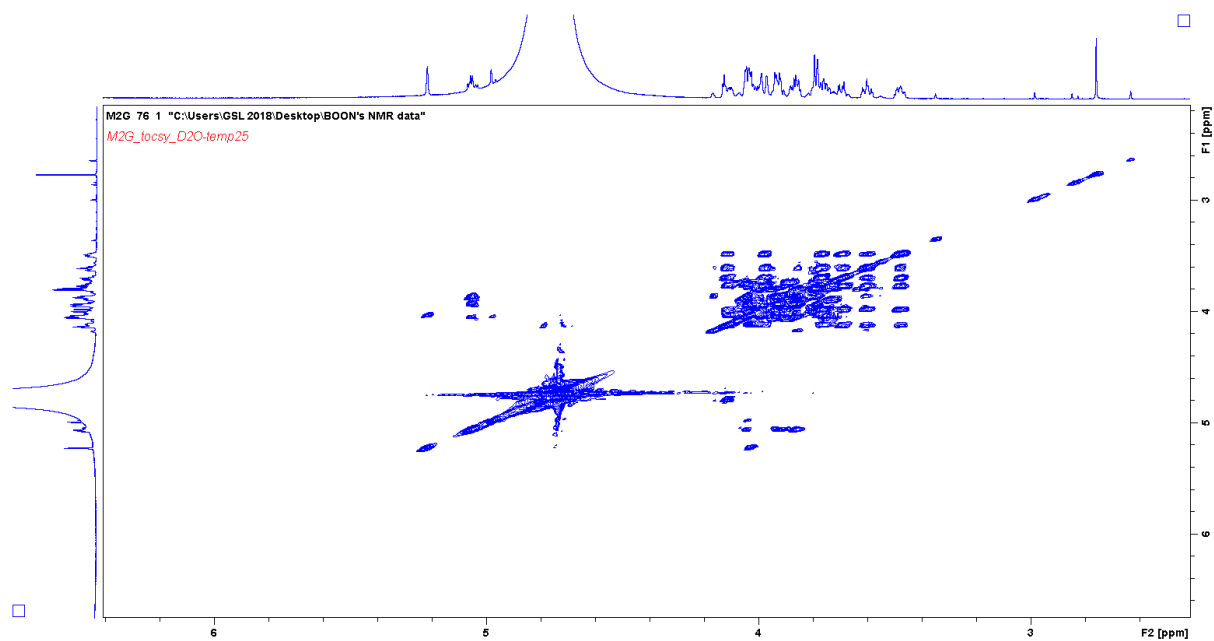

**Fig.S11** TOCSY spectrum of m-3.

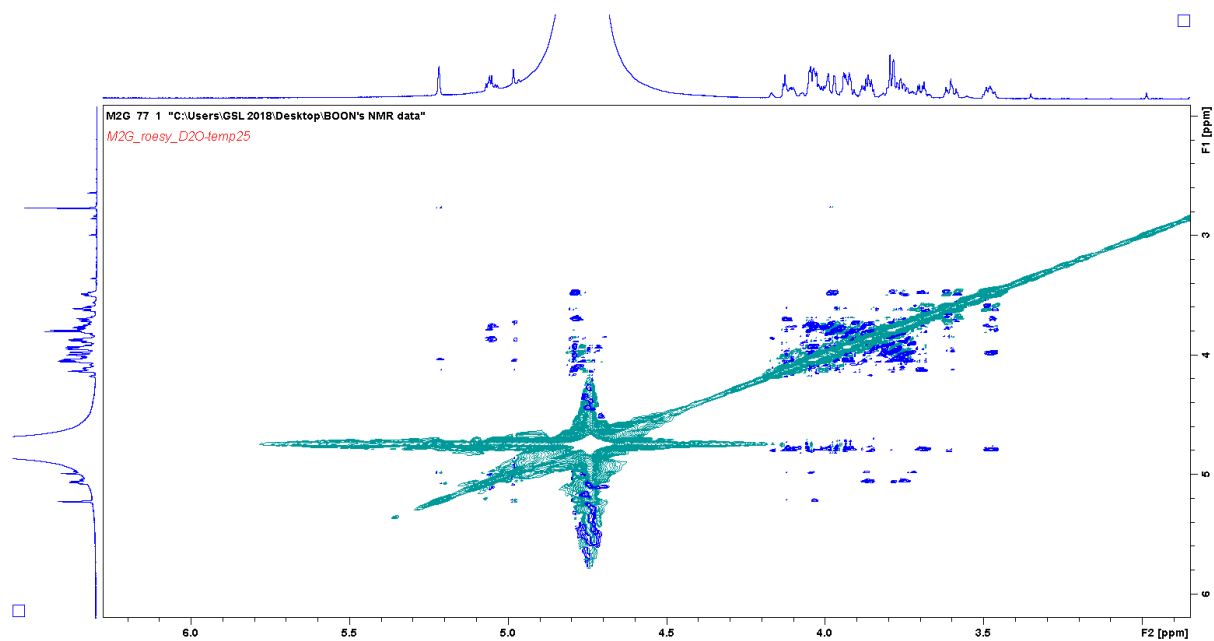

**Fig.S12** ROESY spectrum of m-3.
